# Supplementary material for: Insulin Enhances Migration and Invasion in Prostate Cancer Cells by Up-Regulation of FOXC2
Source: PubMed Central journal article supplement (PMC6652804; doi:10.3389/fendo.2019.00481), 2019-07-17
Supplement: Image_1.pdf [file Image_1.pdf]

# Supplementary Figure 1

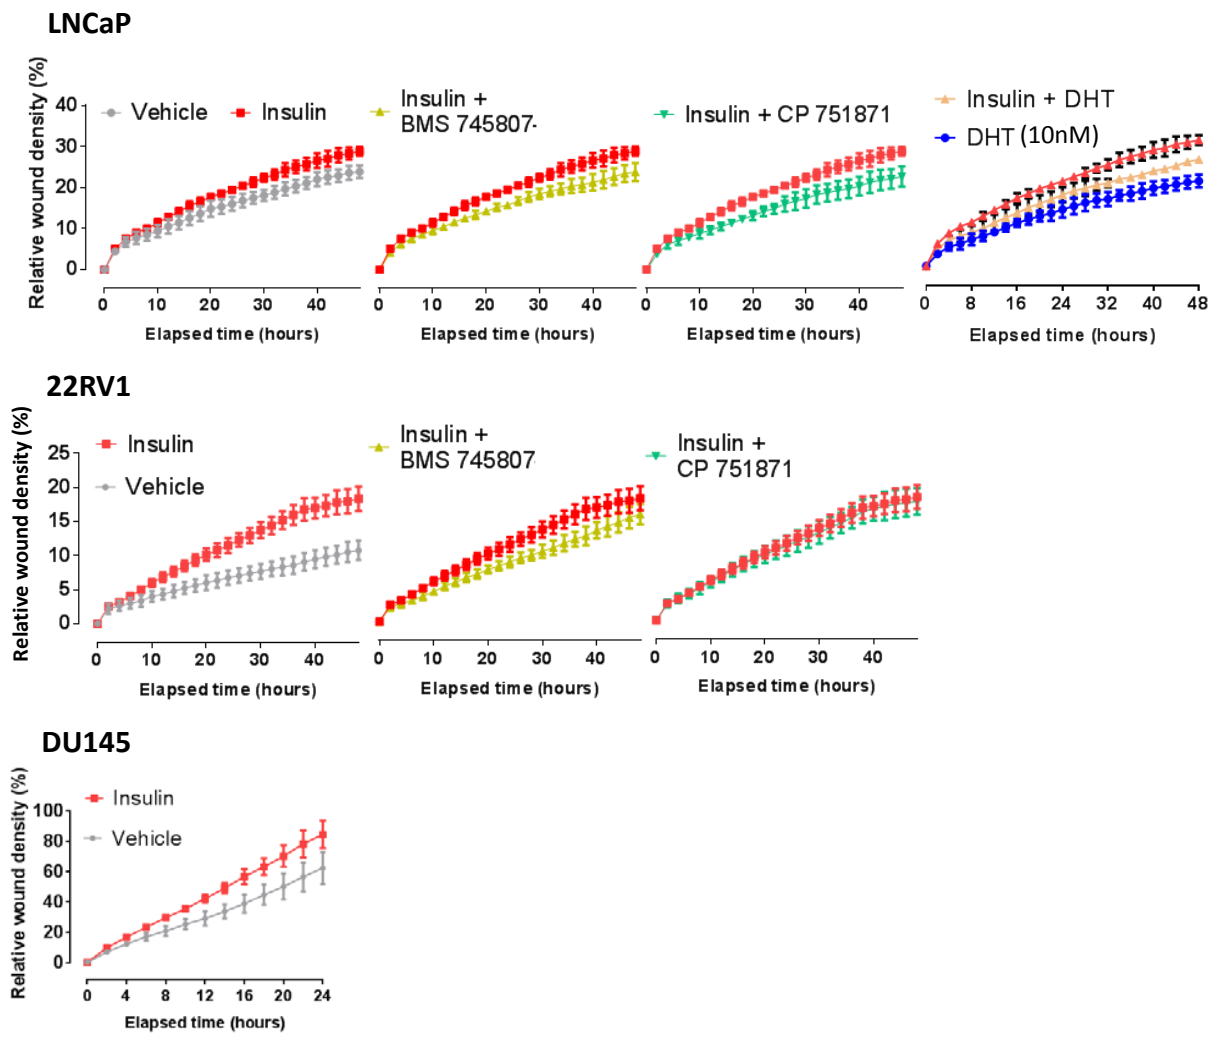

**Supplementary figure 1: Insulin induced migration in PCA cells.** In androgen deprived conditions wound confluency calculated from real time cell imaging showed insulin (10nM) accelerated wound closure in LNCaP, 22RV1 and DU145. The addition of 10 $\mu$ M pan insulin/IGF1R inhibitor BMS 745807 reduced the effects of insulin. The monoclonal antibody to IGF1R, CP 751871 (5 $\mu$ g/ml), reduced insulin-induced migration in LNCaP and DU145 cells, but had insignificant impact on insulin-induced migration in 22RV1 cells (n=3, mean  $\pm$  SEM).
