# Supplementary material for: Insulin Enhances Migration and Invasion in Prostate Cancer Cells by Up-Regulation of FOXC2
Source: PubMed Central journal article supplement (PMC6652804; doi:10.3389/fendo.2019.00481), 2019-07-17
Supplement: Table_1.pdf [file Table_1.pdf]

# Supplementary Table 1

| Gene    | Forward primer (5'-3')    | Reverse primer (5'-3')   |
|---------|---------------------------|--------------------------|
| RPL32   | CCCCTTGTGAAGCCCAAGA       | GACTGGTGCCGGATGAACTT     |
| FOXC2   | GCCTAAGGACCTGGTGAAGC      | TTGACGAAGCACTCGTTGAG     |
| ZEB1    | CAACTACGGTCAGCCC          | GCGGTGTAGAATCAGAGTC      |
| SNAIL   | CCTCCCTGTCAGATGAGGAC      | CCAGGCTGAGGTATTCCTTG     |
| VIM     | ACCAGCTAACCAACGACAAAG     | GCTTCCTCTCTCTGAAGCAT     |
| MMP9    | CTGGGGAAGGAGCCAGTTTG      | AAAAACAAAGGTGAGAAGAGAGGG |
| VTN     | GTGGCTGTCCTTGTCTCCAG      | AAGACACTCTGGATGGGTTAC    |
| CDH1    | GAACGCATTGCCACATACAC      | ATTCGGGCTTGTGTTCATTC     |
| EPCAM   | TGCTCAAAGCTGGCTGCCAAA     | GTGCCGTTGCACTGCTTGGC     |
| DSP     | AAATTACCCTCCCAGCACCAG     | TCCACACTCTGAACTAAAGGAGA  |
| PSA     | AGTGCGAGAAGCATTCCCAAC     | CCAGCAAGATCACGCTTTTGT    |
| NEUROG1 | GCCTTTCTATCTGTCCGTCG      | GTCTGGCACAGTCTTCCTC      |
| NEUROD1 | ACTCCAAGACCCAGAACTGTC     | ACTGGTAGGAGTAGGGATGCAC   |
| SOX8    | CCACAAGAGTGCCCCGTC        | CTGCAGGAACCGTAGTCGG      |
| FUZ     | ACAGACATGGGGCTGTTAGC      | AAGCACAGAGGGGAGAGGG      |
| TUBB3   | AGCAAGGTGCGTGAGGAGTAT     | TGGACAGCGTGGCGTTGTAG     |
| SYP     | GGCTCTGGCCACCTACATCTTC    | CCGATGAGCTAACTAGCCACATGA |
| SST     | CTGAACCCAACCAGACGGAG      | AGCCGGGTTTGAGTTAGCAG     |
| STY1    | AACATGGGGTTGGCTGTTT       | CGGCAGACGGTTATTTTCCT     |
| CHGA    | TCCCTGTGAACAGCCCTATGAATAA | AAAGTGTGTCGGAGATGACCTCAA |
| NCAM    | TGCGACCATCCACCTCAAAG      | CCAGAGTCTTTTCTTCGCTGC    |
| INSR-A  | CTGCACAACGTGGTTTTTCGT     | ACGGCCACCGCACATTC        |
| INSR-B  | CGTCCCCAGAAAAACCTCTTC     | ACGGCCACCGTCACATTC       |

Supplementary table 1: Sequences of primers used in qRT-PCR experiments.
